# Supplementary material
Source: publisher figshare collection journal article supplement (https://sage.figshare.com/ndownloader/files/14579399)
Supplement: Supplementary file 1 [file 14579399]

## **Appendix A: Interview methodology**

The article relies on interview material as one of several sources of evidence. Given the limited amount of publically available information about the processes of local peacemaking after communal conflict, field research in these contexts is essential to improve our theoretical understanding of these phenomena (cf. Wood, 2008). In the manuscript, I rely on interviews, NGO reports, news reports, and previous studies of the cases to establish as thoroughly as possible the variables of interest (government bias, peace agreement, and alternative explanations) in each case.

### **Sample frame and response rate**

For each case, I sought to interview experts, practitioners and locals from the conflict-affected areas. Interviewees were selected strategically based on their roles and insights in conflict and peace processes in different locations, or their knowledge of the broader political dynamics within which these processes are situated. Interviewees can be broken down into government representatives and politicians; NGO representatives; academics/researchers; civil society; and local residents (see interview table below).

In total, around 50 interviews (with a total 57 interviewees) were conducted during field trips in 2013, 2014 and 2016. In general, most people approached also agreed to an interview. One deviation can be noted: attempts to gain access to active high-level politicians were often unsuccessful. To some degree this may have been a function of too limited time in the field, where there was not sufficient time to establish a network and get a personal referral (in the cases concerned, requests were sent by email but were not responded).

In one case – Kerio Valley (which was the topic of a separate, in-depth study) – I also systematically interviewed local residents (older men/”elders”, women, and youth) from both of the conflict-affected communities. I also interviewed local residents in one other case, Tana River, but less systematically. I was not able (due to resource constraints and security concerns) to conduct comparable interviews in Mandera and Wajir. For this reason (and because the analysis is less focused on the broader communities’ experiences and views), I do not rely heavily on the interviews conducted with local residents in the article, aside from a few key interviews with elders and peace committee members.

### **Use of the “snowball” sampling method**

For each case, a number of relevant interviewees from the different categories mentioned were identified in advance. Other interviewees were identified through recommendation by initial interviewees, i.e. through a snowballing technique. The interview table indicates if interviewees were identified in advance or through referral. Use of the snowballing technique was deemed suitable given the interest in politically sensitive topics, where referral from a trusted person alleviates potential mistrust against the researcher (Cohen & Arieli, 2011). Furthermore, in combination with the use of multiple strategically selected entry points to obtain the insights of people with different perspectives, the procedure is suitable when the aim is not to achieve a statistically representative sample of respondents, but rather to establish an understanding of different perspectives on the research question (cf Wood, 2006).

## **Interview format**

In all cases, interviews were semi-structured. This interview method enables a systematic compilation of information on pre-set questions, while also allowing the participants to expand on topics they consider important and to add other relevant information. The interview guide began with contextual information and some personal information (i.e. name, occupation, affiliation, gender and age), then touched on the background and context of conflict, the character of the conflict resolution process, and its outcome (with variations in the cases when interviews were held with experts on a more general, or more specific, topic).

All interviews were preceded by acquiring informed consent, and participants were given a sheet of information about the project, including contact details. Participants were informed that there was no economic compensation for participating, but were usually provided with a soda or cup of tea. Interviews lasted between 25 minutes and 1 hour 45 minutes (most were around one hour long). In most cases, interviews were recorded using a small digital recorder. In some other cases, when interviewees declined to be recorded or for practical reasons, only notes were taken.

## **Ethical and security concerns**

Before the field research, I obtained approval from the Swedish Ethics Review Board (Etikprövningsnämnden, EPN). Conducting interviews on the subject of violent conflict is always sensitive. The benefits of accessing primary information about the conflicts must always be weighed against the risk that interview participants are re-traumatized or otherwise subjected to risk due to participation (Brounéus, 2011). In some cases, particularly when conflict is still active, associating with outsiders and sharing information may endanger participants' physical security (Mertus, 2009). For these reasons, I conducted continuous risk assessments while in the field, and participants were always informed that they could withdraw participation at any time before, during or after the interview. Identifying information and interview recordings were stored under password protection while in the field, as well as thereafter.

## **Confidence levels and compensation strategies**

A key concern when collecting and interpreting the interview material was awareness of the different biases and interests of participants in telling a specific story. In my case, it was important to keep in mind that certain respondents might – intentionally or unintentionally – omit information, seek to play up their own importance in a local peace process, or promote a certain narrative about how a local conflict played out. However, as mentioned above, interviews were not the only or primary source of information, but rather one of several sources used to assess the variables of interest in each case. Instead interviews served as one of several sources used to verify and triangulate factual accounts (Höglund & Öberg, 2011; Wood, 2008). The full set of sources includes the interview material and an extensive review of secondary sources, which in turn encompasses different sources with potentially different interests/biases – including government and NGO reports, news articles, and academic case studies. Overall, since I was not able to visit Mandera and Wajir, the relative reliance on secondary sources is higher in those cases.

**Table 1. Interview methods table**

| Interviewee                                             | Case focus   | Date & place                 | Format                                          | Length     | Recording         | Source       |
|---------------------------------------------------------|--------------|------------------------------|-------------------------------------------------|------------|-------------------|--------------|
| <b>Government representatives and local politicians</b> |              |                              |                                                 |            |                   |              |
| NSC official                                            | All cases    | 15 March 2013, Nairobi       | In person, at offices                           | 1 h        | Yes               | Sample frame |
| Former MP                                               | Kerio Valley | 18 February 2014, Nairobi    | In person, at quiet café, her assistant present | 1h 10 min  | Yes               | Sample frame |
| Local government rep.                                   | Kerio Valley | 26 February 2014, Chesongoch | In person, with translator, busy place          | 1 h        | Yes               | Sample frame |
| Local government rep.                                   | Kerio Valley | 27 February 2014, Kolowa     | In person, at offices                           | 1 h        | Yes               | Sample frame |
| NSC official                                            | All cases    | 24 May 2016, Nairobi         | In person, at offices                           | 35 min     | Yes               | Sample frame |
| <b>NGO representatives</b>                              |              |                              |                                                 |            |                   |              |
| International peace NGO rep.                            | All cases    | 14 March 2013, Nairobi       | In person, at offices                           | 1 h 45 min | Yes               | Sample frame |
| Local peace NGO rep.                                    | Tana River   | 15 March 2013, Nairobi       | In person, at busy restaurant                   | ca 1 h     | <i>Notes only</i> | Sample frame |
| Local peace NGO rep.                                    | Kerio Valley | 18 March 2013, Nakuru        | In person, at busy café                         | ca 45 min  | <i>Notes only</i> | Sample frame |
| Local NGO rep.                                          | All cases    | 19 March 2013, Nakuru        | In person, at busy café                         | ca 45 min  | <i>Notes only</i> | Referral     |
| Local NGO rep.                                          | All cases    | 19 March 2013, Nakuru        | In person, at offices                           | 1 h        | Yes               | Sample frame |
| Humanitarian worker                                     | Tana River   | 22 May 2016, Makueni         | In person, at quiet shop                        | 1 h 10 min | Yes               | Sample frame |
| Local NGO rep.                                          | Tana River   | 23 May 2016, Nairobi         | In person, at quiet restaurant                  | 50 min     | Yes               | Referral     |

|                               |                |                      |                                           |            |     |              |
|-------------------------------|----------------|----------------------|-------------------------------------------|------------|-----|--------------|
| International peace NGO rep.  | Tana River     | 23 May 2016, Nairobi | In person, at quiet restaurant            | 1 h 5 min  | Yes | Sample frame |
| 2 international peace workers | Wajir, Mandera | 24 May 2016, Nairobi | In person, at offices,<br>group interview | 1 h 10 min | Yes | Referral     |

#### **Academics/researchers**

|                                |                |                        |                               |           |                   |              |
|--------------------------------|----------------|------------------------|-------------------------------|-----------|-------------------|--------------|
| Conflict resolution consultant | All cases      | 13 March 2013, Nairobi | In person, at busy café       | 1 h       | Yes               | Sample frame |
| Development researcher         | All cases      | 21 March 2013, Eldoret | In person, at busy restaurant | ca 45 min | <i>Notes only</i> | Sample frame |
| Security analyst               | Wajir, Mandera | 24 May 2016, Nairobi   | In person, at busy café       | 1 h       | Yes               | Sample frame |
| Security analyst               | Mandera        | 8 June 2016            | In person, over Skype         | ca 45 min | <i>Notes only</i> | Referral     |

#### **Civil society**

|                               |              |                              |                                                     |            |                   |              |
|-------------------------------|--------------|------------------------------|-----------------------------------------------------|------------|-------------------|--------------|
| Local youth leader            | All cases    | 19 March 2013, Nakuru        | In person, at busy café                             | 45 min     | Yes               | Sample frame |
| Peace committee chair         | All cases    | 21 March 2013, Eldoret       | In person, at busy restaurant                       | 1 h 30 min | Yes               | Referral     |
| Peace committee secretary     | All cases    | 21 March 2013, Eldoret       | In person, at busy restaurant                       | ca 30 min  | <i>Notes only</i> | Referral     |
| Peace campaigner              | All cases    | 21 March 2013, Eldoret       | In person, at busy restaurant                       | ca 30 min  | <i>Notes only</i> | Referral     |
| CJPC official                 | Kerio Valley | 20 March 2013, Eldoret       | In person, at offices                               | 45 min     | Yes               | Sample frame |
| Religious leader (catholic)   | Kerio Valley | 22 February 2014, Eldoret    | In person, at offices                               | 1 h        | Yes               | Sample frame |
| Religious leader (protestant) | Kerio Valley | 23 February 2014, Eldoret    | In person, at offices                               | 30 min     | Yes               | Sample frame |
| Religious leader (catholic)   | Kerio Valley | 25 February 2014, Chesongoch | In person, quiet place,<br>referring person present | 30 min     | Yes               | Referral     |

|                             |              |                                 |                                                   |               |                   |              |
|-----------------------------|--------------|---------------------------------|---------------------------------------------------|---------------|-------------------|--------------|
| Religious leader (baptist)  | Kerio Valley | 1 March 2014, Tot               | In person, quiet place                            | 30 min        | Yes               | Referral     |
| Catholic church official    | Tana River   | 25 May 2016, Malindi            | In person, at offices                             | 50 min        | Yes               | Sample frame |
| 2 CJPC officials            | Tana River   | 25 May 2016, Malindi            | In person, at offices,<br>group interview         | ca 1 h 30 min | <i>Notes only</i> | Referral     |
| <b>Local residents</b>      |              |                                 |                                                   |               |                   |              |
| Marakwet elder              | Kerio Valley | 24 February 2014,<br>Chesongoch | In person, with translator,<br>busy place         | 40 min        | Yes               | Sample frame |
| Marakwet elder              | Kerio Valley | 24 February 2014,<br>Chesongoch | In person, with translator,<br>busy place         | 1 h 10 min    | Yes               | Referral     |
| Marakwet elder              | Kerio Valley | 24 February 2014,<br>Chesongoch | In person, with translator,<br>busy place         | 45 min        | Yes               | Referral     |
| Marakwet youth/civic leader | Kerio Valley | 24 February 2014,<br>Chesongoch | In person, busy place,<br>referring person nearby | 30 min        | Yes               | Referral     |
| Marakwet youth              | Kerio Valley | 24 February 2014,<br>Chesongoch | In person, with translator,<br>quiet place        | 30 min        | Yes               | Sample frame |
| Marakwet woman              | Kerio Valley | 26 February 2014,<br>Chesongoch | In person, with translator,<br>quiet place        | 30 min        | Yes               | Sample frame |
| Marakwet woman              | Kerio Valley | 26 February 2014,<br>Chesongoch | In person, with translator,<br>at home            | 30 min        | Yes               | Referral     |
| Pokot elder                 | Kerio Valley | 27 February 2014, Kolowa        | In person, with translator,<br>busy marketplace   | 35 min        | Yes               | Sample frame |

|                        |              |                              |                                                             |            |                   |              |
|------------------------|--------------|------------------------------|-------------------------------------------------------------|------------|-------------------|--------------|
| Pokot woman            | Kerio Valley | 27 February 2014, Kolowa     | In person, with translator, busy marketplace                | 30 min     | Yes               | Sample frame |
| Pokot woman            | Kerio Valley | 27 February 2014, Kolowa     | In person, with translator, busy marketplace                | 35 min     | Yes               | Referral     |
| Pokot youth/herdsman   | Kerio Valley | 27 February 2014, Kolowa     | In person, with translator, busy marketplace                | 35 min     | Yes               | Sample frame |
| Pokot elder            | Kerio Valley | 27 February 2014, Kolowa     | In person, with transl, busy, referring person present      | 30 min     | Yes               | Referral     |
| Pokot woman            | Kerio Valley | 28 February 2014, Chepchoren | In person, with translator, quiet place                     | 35 min     | Yes               | Sample frame |
| Pokot woman            | Kerio Valley | 28 February 2014, Chepchoren | In person, with translator, quiet place                     | 25 min     | Yes               | Referral     |
| Marakwet elder         | Kerio Valley | 1 March 2014, Tot            | In person, with translator, quiet place                     | 35 min     | Yes               | Sample frame |
| Marakwet woman         | Kerio Valley | 1 March 2014, Tot            | In person, with translator, quiet place                     | 30 min     | Yes               | Sample frame |
| Peace committee member | Kerio Valley | 3 March 2014, Chesongoch     | In person, with translator, quiet place                     | 1 h 40 min | Yes               | Referral     |
| Pokot youth/herdsman   | Kerio Valley | 3 March 2014, Chesongoch     | In person, with translator, quiet, referring person present | 30 min     | Yes               | Referral     |
| Pokot youth/herdsman   | Kerio Valley | 3 March 2014, Chesongoch     | In person, with translator, quiet, referring person present | 30 min     | Yes               | Referral     |
| 2 Pokomo elders        | Tana River   | 27 May 2016, Wema            | In person, with translator, quiet, group interview          | ca 45 min  | <i>Notes only</i> | Sample frame |

|                        |            |                   |                                                       |           |                   |              |
|------------------------|------------|-------------------|-------------------------------------------------------|-----------|-------------------|--------------|
| Pokomo woman           | Tana River | 27 May 2016, Wema | In person, with translator,<br>busy place             | ca 30 min | <i>Notes only</i> | Sample frame |
| Pokomo man             | Tana River | 27 May 2016, Wema | In person, with translator,<br>busy place             | ca 30 min | <i>Notes only</i> | Referral     |
| Peace committee member | Tana River | 27 May 2016, Wema | In person, with translator,<br>busy place             | ca 30 min | <i>Notes only</i> | Sample frame |
| Pokomo woman and man   | Tana River | 27 May 2016, Wema | In person, with translator,<br>quiet, group interview | ca 45 min | <i>Notes only</i> | Referral     |

## References

- Brounéus, K. (2011). In-depth interviewing: The process, skill and ethics of interviews in peace research. In K. Höglund & M. Öberg (eds.) *Understanding peace research: methods and challenges*. Abingdon: Routledge, 130–145.
- Cohen, N., & Arieli, T. (2011). Field research in conflict environments: Methodological challenges and snowball sampling. *Journal of Peace Research* 48(4): 423–435.
- Höglund, K., & Öberg, M. (2011). 11 Improving Information Gathering and Evaluation. *Understanding Peace Research: Methods and Challenges*, 185–198.
- Mertus, J. (2009). Maintenance of personal security: ethical and operational issues. In C. L. Sriram, J. C. King, J. A. Mertus, O. Martin-Ortega & J. Herman (eds.) *Surviving Field Research: Working in violent and difficult situations*. Abingdon: Routledge, 165–176.
- Wood, E. J. (2006). The ethical challenges of field research in conflict zones. *Qualitative sociology* 29(3): 373–386.
- Wood, E. J. (2008) Field research. In C. Boix & S. Stokes (eds.) *Oxford Handbook of Comparative Politics*. Oxford: Oxford University Press, 123–146.
